# Supplementary material
Source: PubMed Central journal article supplement (PMC3622341)
Supplement: supp_M034223_jlr.M034223-1.pdf [file supp_M034223_jlr.M034223-1.pdf]

## Supporting Information

TABLE S1. UPLC-HRMS analysis of the intermediates involved in anaerobic testosterone catabolism by *S. denitrificans*.

| No. <sup>a</sup> | Compound ID                                                        | UPLC behavior (RT <sup>b</sup> , min) | Molecular formula/ (predicted molecular mass) <sup>c</sup> | Dominant ion peaks               | Identification of product ions                                                                     | Mode observed                       |
|------------------|--------------------------------------------------------------------|---------------------------------------|------------------------------------------------------------|----------------------------------|----------------------------------------------------------------------------------------------------|-------------------------------------|
| 1                | Testosterone                                                       | 6.20                                  | C <sub>19</sub> H <sub>28</sub> O <sub>2</sub><br>288.2082 | 271.2062<br>289.2147<br>311.1987 | [M-H <sub>2</sub> O+H] <sup>+</sup><br>[M+H] <sup>+</sup><br>[M+Na] <sup>+</sup>                   | ESI and APCI<br>ESI and APCI<br>ESI |
| <b>1'</b>        | <b>Androst-4-en-3,17-dione</b>                                     | 5.96                                  | C <sub>19</sub> H <sub>26</sub> O <sub>2</sub><br>286.1926 | 269.1909<br>287.2031<br>309.1831 | [M-H <sub>2</sub> O+H] <sup>+</sup><br>[M+H] <sup>+</sup><br>[M+Na] <sup>+</sup>                   | ESI and APCI<br>ESI and APCI<br>ESI |
| <b>2</b>         | <b>1-Dehydrotestosterone</b>                                       | 5.82                                  | C <sub>19</sub> H <sub>26</sub> O <sub>2</sub><br>286.1926 | 269.1903<br>287.2000<br>309.1823 | [M-H <sub>2</sub> O+H] <sup>+</sup><br>[M+H] <sup>+</sup><br>[M+Na] <sup>+</sup>                   | ESI and APCI<br>ESI and APCI<br>ESI |
| <b>2'</b>        | <b>Androsta-1,4-diene-3,17-dione</b>                               | 5.50                                  | C <sub>19</sub> H <sub>24</sub> O <sub>2</sub><br>284.1770 | 267.1742<br>285.1852<br>307.1666 | [M-H <sub>2</sub> O+H] <sup>+</sup><br>[M+H] <sup>+</sup><br>[M+Na] <sup>+</sup>                   | ESI and APCI<br>ESI and APCI<br>ESI |
| 3                | 1-Testosterone                                                     | 6.55                                  | C <sub>19</sub> H <sub>28</sub> O <sub>2</sub><br>288.2082 | 271.2062<br>289.2163<br>311.1987 | [M-H <sub>2</sub> O+H] <sup>+</sup><br>[M+H] <sup>+</sup><br>[M+Na] <sup>+</sup>                   | ESI and APCI<br>ESI and APCI<br>ESI |
| 3'               | Androst-1-en-3,17-dione                                            | 6.35                                  | C <sub>19</sub> H <sub>26</sub> O <sub>2</sub><br>286.1926 | 269.1905<br>287.1999<br>309.1831 | [M-H <sub>2</sub> O+H] <sup>+</sup><br>[M+H] <sup>+</sup><br>[M+Na] <sup>+</sup>                   | ESI and APCI<br>ESI and APCI<br>ESI |
| 4                | 1,17-dihydroxy-androstan-3-one                                     | 5.64                                  | C <sub>19</sub> H <sub>30</sub> O <sub>3</sub><br>306.2187 | 289.2168<br>307.2267<br>329.2093 | [M-H <sub>2</sub> O+H] <sup>+</sup><br>[M+H] <sup>+</sup><br>[M+Na] <sup>+</sup>                   | ESI and APCI<br>ESI and APCI<br>ESI |
| 5                | 17-hydroxy-androstan-1,3-dione                                     | 5.05                                  | C <sub>19</sub> H <sub>28</sub> O <sub>3</sub><br>304.2013 | 287.2011<br>305.2127<br>327.1936 | [M-H <sub>2</sub> O+H] <sup>+</sup><br>[M+H] <sup>+</sup><br>[M+Na] <sup>+</sup>                   | ESI and APCI<br>ESI and APCI<br>ESI |
| 5'               | Androstan-1,3,17-trione                                            | 4.72                                  | C <sub>19</sub> H <sub>26</sub> O <sub>3</sub><br>302.1875 | 285.1855<br>303.1915<br>325.1780 | [M-H <sub>2</sub> O+H] <sup>+</sup><br>[M+H] <sup>+</sup><br>[M+Na] <sup>+</sup>                   | ESI and APCI<br>ESI and APCI<br>ESI |
| 6                | 17-hydroxy-1-oxo-2,3- <i>seco</i> -androstan-3-oic acid (2,3-SAOA) | 5.42                                  | C <sub>19</sub> H <sub>30</sub> O <sub>4</sub><br>322.2136 | 305.2117<br>323.2227<br>345.2042 | [M-H <sub>2</sub> O+H] <sup>+</sup><br>[M+H] <sup>+</sup><br>[M+Na] <sup>+</sup>                   | ESI and APCI<br>ESI and APCI<br>ESI |
| 6'               | 1,17-dioxo-2,3- <i>seco</i> -androstan-3-oic acid                  | 5.34                                  | C <sub>19</sub> H <sub>28</sub> O <sub>4</sub><br>320.1980 | 303.1960<br>321.2070<br>343.1885 | [M-H <sub>2</sub> O+H] <sup>+</sup><br>[M+H] <sup>+</sup><br>[M+Na] <sup>+</sup>                   | ESI and APCI<br>ESI and APCI<br>ESI |
| X                | Compound X                                                         | 4.22                                  | C <sub>17</sub> H <sub>26</sub> O <sub>4</sub><br>294.1824 | 259.1705<br>277.1823<br>317.1718 | [M-2H <sub>2</sub> O+H] <sup>+</sup><br>[M-H <sub>2</sub> O+H] <sup>+</sup><br>[M+Na] <sup>+</sup> | ESI and APCI<br>ESI and APCI<br>ESI |

<sup>a</sup>Compound numbers mentioned in **Fig. 3A**. <sup>b</sup>RT, retention time. <sup>c</sup>The predicated molecular mass was calculated using the atom mass of <sup>12</sup>C (12.0000), <sup>16</sup>O (15.9949), and <sup>1</sup>H (1.0078). The common initial intermediates involved both in aerobic and anaerobic catabolism are highlighted in bold.

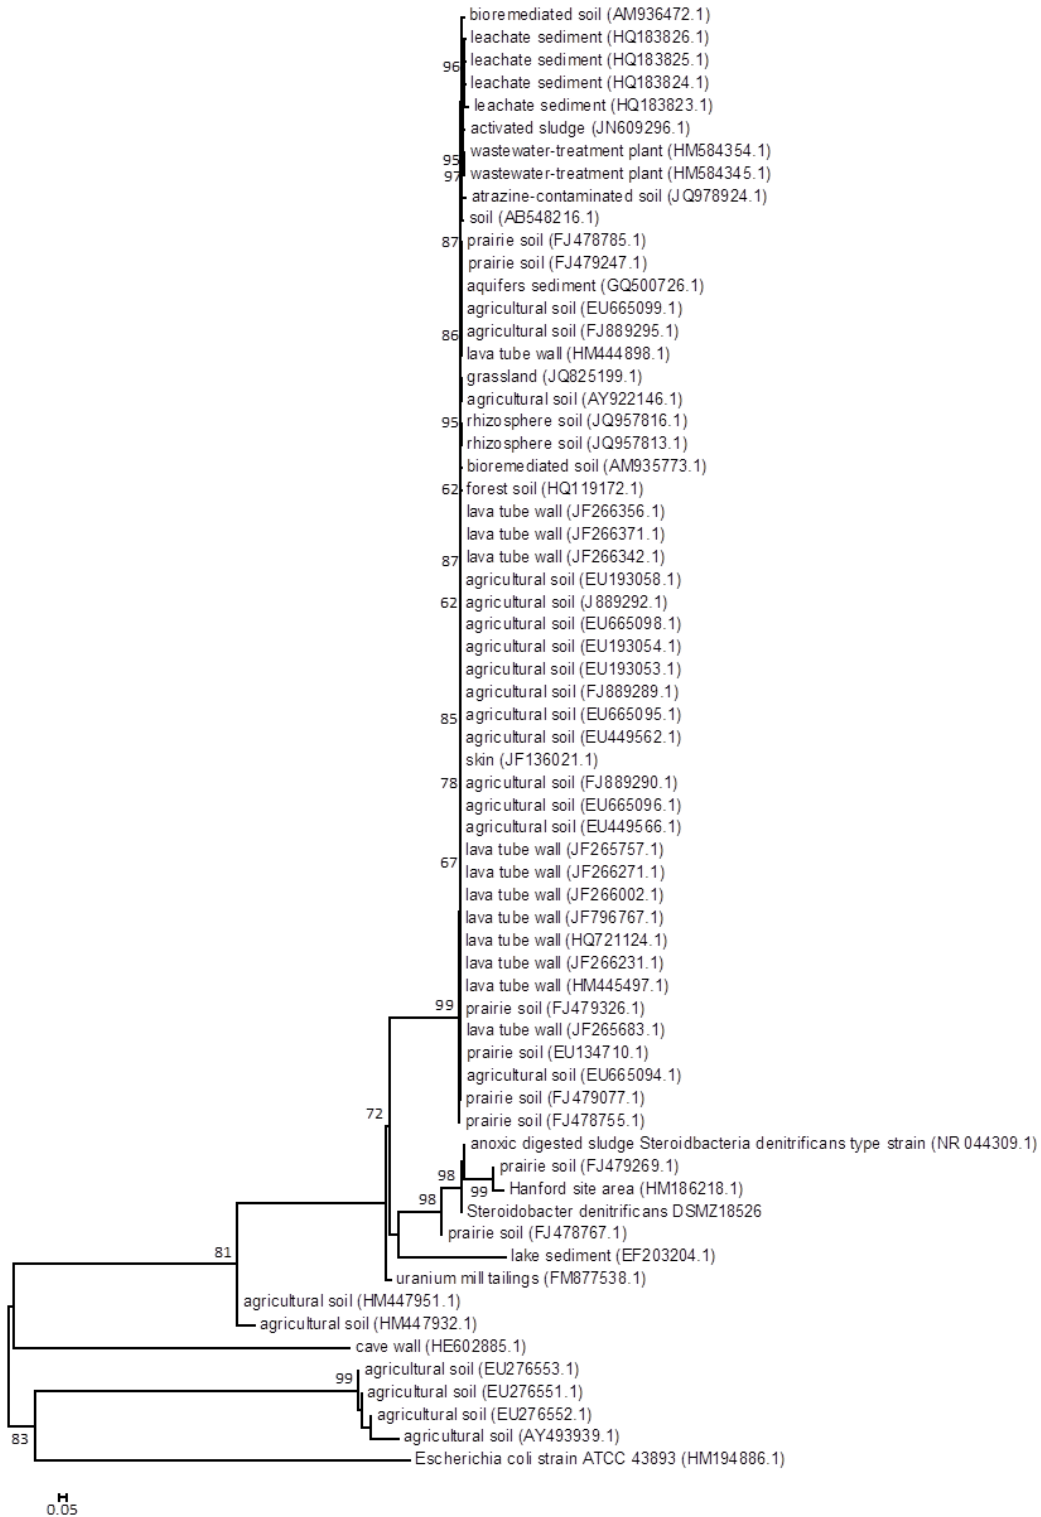

**Fig. S1.** Phylogenetic analysis of *S. denitrificans* strains. Sixty-three 16S rRNA genes were retrieved from NCBI with more than 98% nucleotide sequence similarity to the 16S rRNA gene of *S. denitrificans* DSMZ18526. 16S rRNA gene of *Escherichia coli* ATCC 43893 served as an outgroup sequence. The neighbor-joining consensus gene tree contains 65 genes. The bootstrap confident values were obtained with 1000 re-samplings. The scale bar indicates 0.05 substitutions per nucleotide position.
